# Supplementary material for: Analysis of Gene Expression Profiles, Cytokines, and Bacterial Loads Relevant to Alcoholic Liver Disease Mice Infected With V. vulnificus
Source: Front Immunol. 2021 Aug 20;12:695491. doi: 10.3389/fimmu.2021.695491 (PMC8417779; doi:10.3389/fimmu.2021.695491)
Supplement: Supplementary file 3 [file Table_2.xlsx]

## Sheet: Sheet1
	Table S2. Summary statistics of the transcriptome assembled
	Tissues	sample	raw_reads	clean_reads	Q30	GC_pct	total_map	unique_map	multi_map	sample	raw_reads	clean_reads	Q30	GC_pct	total_map	unique_map	multi_map
	blood	Pair_B1	54149702	47970904	95.4	56.65	46745860(97.45%)	22306903(46.5%)	24438957(50.95%)	ETOH_B1	45252506	41941380	95.95	57.25	40938261(97.61%)	19176610(45.72%)	21761651(51.89%)
		Pair_B2	46657200	42640022	95.43	56.76	41554417(97.45%)	18129850(42.52%)	23424567(54.94%)	ETOH_B2	50833958	45820742	95.23	56.9	44509299(97.14%)	21458355(46.83%)	23050944(50.31%)
		Pair_B3	46799996	42574598	95.19	56.83	41448415(97.35%)	19757837(46.41%)	21690578(50.95%)	ETOH_B3	47465318	43556788	95.47	56.69	42418284(97.39%)	19833683(45.54%)	22584601(51.85%)
		Pair_B4	46245106	43756140	95.22	57.38	42699029(97.58%)	17145729(39.18%)	25553300(58.4%)	ETOH_B4	46622536	42219234	95.39	56.54	41123956(97.41%)	19243749(45.58%)	21880207(51.83%)
		Pair_B5	45632578	40485686	94.95	56.21	39297225(97.06%)	20776436(51.32%)	18520789(45.75%)	ETOH_B5	49738158	45636442	94.69	56.76	44254927(96.97%)	20911963(45.82%)	23342964(51.15%)
	small intestine	Pair_I1	47753700	45805718	94.34	51.17	44346375(96.81%)	41480198(90.56%)	2866177(6.26%)	ETOH_I1	44987088	43296134	95.14	51.45	42087413(97.21%)	39132674(90.38%)	2954739(6.82%)
		Pair_I2	41879200	40177816	94.26	51.41	39137749(97.41%)	36288418(90.32%)	2849331(7.09%)	ETOH_I2	43931834	41886766	94.5	51.17	40608715(96.95%)	37860383(90.39%)	2748332(6.56%)
		Pair_I3	40638744	39228394	94.36	51.53	38137720(97.22%)	35550534(90.62%)	2587186(6.6%)	ETOH_I3	46325632	44679714	94.63	51.4	43438329(97.22%)	40792954(91.3%)	2645375(5.92%)
		Pair_I4	47192132	45042890	94.51	51.84	43759395(97.15%)	40960971(90.94%)	2798424(6.21%)	ETOH_I4	41686840	40236886	94.15	51.52	39119372(97.22%)	36877635(91.65%)	2241737(5.57%)
		Pair_I5	46834788	45981646	95.32	50.79	44752177(97.33%)	41259920(89.73%)	3492257(7.59%)	ETOH_I5	42634024	41006804	94.28	51.49	39820090(97.11%)	37489426(91.42%)	2330664(5.68%)
	liver	Pair_L1	45883060	44398134	94.36	48.96	42790468(96.38%)	39536996(89.05%)	3253472(7.33%)	ETOH_L1	46669234	45260686	94.24	50.41	43867864(96.92%)	41154153(90.93%)	2713711(6.0%)
		Pair_L2	45276368	43731910	94.35	48.59	42182459(96.46%)	38605198(88.28%)	3577261(8.18%)	ETOH_L2	43470046	42217130	94.38	49.97	40788677(96.62%)	38172721(90.42%)	2615956(6.2%)
		Pair_L3	44508534	43132482	94.44	49.35	41591498(96.43%)	38457781(89.16%)	3133717(7.27%)	ETOH_L3	47408560	45817088	95.91	50.7	44580103(97.3%)	42030388(91.74%)	2549715(5.56%)
		Pair_L4	42462730	41364726	94.39	49.84	39745741(96.09%)	36799131(88.96%)	2946610(7.12%)	ETOH_L4	45699414	44366124	94.44	50.61	42982298(96.88%)	40433121(91.14%)	2549177(5.75%)
		Pair_L5	43461452	41710786	94.84	50.28	40319149(96.66%)	37586847(90.11%)	2732302(6.55%)	ETOH_L5	42708616	41377244	94.39	50.43	40099573(96.91%)	37615422(90.91%)	2484151(6.0%)
	spleen	Pair_S1	52635544	51037244	94.36	49.62	49699673(97.38%)	45351128(88.86%)	4348545(8.52%)	ETOH_S1	43899936	42561250	93.55	50.65	41017130(96.37%)	37232685(87.48%)	3784445(8.89%)
		Pair_S2	41832384	40210686	94.21	49.27	39122707(97.29%)	35394547(88.02%)	3728160(9.27%)	ETOH_S2	44328066	42933842	93.94	50.34	41509338(96.68%)	39017694(90.88%)	2491644(5.8%)
		Pair_S3	45089092	43079732	94.06	50.75	41632976(96.64%)	38652291(89.72%)	2980685(6.92%)	ETOH_S3	43605584	42288132	93.99	50.93	40791868(96.46%)	38518539(91.09%)	2273329(5.38%)
		Pair_S4	45712798	44209352	93.85	50.6	42736907(96.67%)	39432817(89.2%)	3304090(7.47%)	ETOH_S4	41554232	39885858	94.58	50.99	38643876(96.89%)	35661645(89.41%)	2982231(7.48%)
		Pair_S5	45079444	43444332	94.31	50.64	42136247(96.99%)	36057451(83.0%)	6078796(13.99%)	ETOH_S5	42355640	41114784	93.17	50.74	39734794(96.64%)	37021339(90.04%)	2713455(6.6%)
	blood	Pair_B1Y	47906880	43998300	95.02	56.75	42768355(97.2%)	18846691(42.84%)	23921664(54.37%)	ETOH_B1Y	48180334	44175570	94.97	56.43	42788534(96.86%)	20800667(47.09%)	21987867(49.77%)
		Pair_B2Y	46577934	42459352	94.96	56.3	41258705(97.17%)	21635404(50.96%)	19623301(46.22%)	ETOH_B2Y	46254692	41426004	95.13	56.68	40240807(97.14%)	19223026(46.4%)	21017781(50.74%)
		Pair_B3Y	45509132	41255294	95.2	56.62	40057610(97.1%)	18515337(44.88%)	21542273(52.22%)	ETOH_B3Y	48030156	42933114	95.4	56.94	41823308(97.42%)	21342888(49.71%)	20480420(47.7%)
		Pair_B4Y	45679700	40297892	95.29	56.39	39120646(97.08%)	19268705(47.82%)	19851941(49.26%)	ETOH_B4Y	45895464	42096412	95.47	56.58	41010795(97.42%)	19361063(45.99%)	21649732(51.43%)
		Pair_B5Y	47253770	42494368	95.1	56.61	41270703(97.12%)	21795086(51.29%)	19475617(45.83%)	ETOH_B5Y	47459414	44213398	94.46	56.52	42818921(96.85%)	20657939(46.72%)	22160982(50.12%)
	small intestine	Pair_I1Y	45327436	43428070	94.38	51.92	42183454(97.13%)	39496868(90.95%)	2686586(6.19%)	ETOH_I1Y	46357956	44493134	93.76	50.44	42732872(96.04%)	39626933(89.06%)	3105939(6.98%)
		Pair_I2Y	45353262	43410336	94.76	51.58	42170239(97.14%)	39695284(91.44%)	2474955(5.7%)	ETOH_I2Y	41158542	39275340	94.26	50.34	38047659(96.87%)	34957274(89.01%)	3090385(7.87%)
		Pair_I3Y	41186690	39200386	94.21	50.91	37979846(96.89%)	35680615(91.02%)	2299231(5.87%)	ETOH_I3Y	43783768	41995510	94.94	50.96	40896637(97.38%)	38044595(90.59%)	2852042(6.79%)
		Pair_I4Y	45937234	43437070	94.57	51.88	42283817(97.35%)	39775630(91.57%)	2508187(5.77%)	ETOH_I4Y	46354426	44645438	93.19	51.04	43356476(97.11%)	40444028(90.59%)	2912448(6.52%)
		Pair_I5Y	44200604	42862458	94.45	51.91	41326721(96.42%)	38925891(90.82%)	2400830(5.6%)	ETOH_I5Y	45105910	42721918	94.62	51	41575371(97.32%)	38748468(90.7%)	2826903(6.62%)
	liver	Pair_L1Y	46584170	45351340	94.26	50.08	43857622(96.71%)	40981593(90.36%)	2876029(6.34%)	ETOH_L1Y	42501664	41337544	94.16	50.73	40372540(97.67%)	37906848(91.7%)	2465692(5.96%)
		Pair_L2Y	41383830	39906530	94.6	50.8	38140954(95.58%)	35708972(89.48%)	2431982(6.09%)	ETOH_L2Y	44560108	43200782	94.2	50.51	42090927(97.43%)	39435957(91.29%)	2654970(6.15%)
		Pair_L3Y	45714310	44298774	94.54	50.57	43078879(97.25%)	40279275(90.93%)	2799604(6.32%)	ETOH_L3Y	41478804	39932866	94.4	48.65	38829722(97.24%)	36082328(90.36%)	2747394(6.88%)
		Pair_L4Y	43334476	41439542	94.86	50.92	40131578(96.84%)	37359471(90.15%)	2772107(6.69%)	ETOH_L4Y	41691996	39988040	94.5	47.76	38897222(97.27%)	35704578(89.29%)	3192644(7.98%)
		Pair_L5Y	44166990	42752898	94.38	50.58	41282473(96.56%)	38461797(89.96%)	2820676(6.6%)	ETOH_L5Y	44133886	41842596	94.92	47.45	40851121(97.63%)	37435365(89.47%)	3415756(8.16%)
	spleen	Pair_S1Y	44200824	42869576	93.94	51.12	41348766(96.45%)	38173384(89.05%)	3175382(7.41%)	ETOH_S1Y	45586976	44328466	94.18	51.25	43172042(97.39%)	40305282(90.92%)	2866760(6.47%)
		Pair_S2Y	43252226	41902730	94.47	50.76	40534526(96.73%)	38285848(91.37%)	2248678(5.37%)	ETOH_S2Y	47668636	46390826	94.35	51.09	45110176(97.24%)	42044941(90.63%)	3065235(6.61%)
		Pair_S3Y	42707156	41600056	94.04	51.28	40524523(97.41%)	37611531(90.41%)	2912992(7.0%)	ETOH_S3Y	47879362	46026012	94.24	49.32	44753760(97.24%)	41443087(90.04%)	3310673(7.19%)
		Pair_S4Y	42846616	41140648	94.35	51.05	40080143(97.42%)	38085330(92.57%)	1994813(4.85%)	ETOH_S4Y	43570500	41022860	94.11	47.26	39905851(97.28%)	37219625(90.73%)	2686226(6.55%)
		Pair_S5Y	41680342	40572450	93.96	51.03	39559860(97.5%)	37590239(92.65%)	1969621(4.85%)	ETOH_S5Y	44057564	41471956	94.71	47.02	40519313(97.7%)	37220156(89.75%)	3299157(7.96%)
